## Correction: Relationship Between Mitochondrial Electron Transport Chain Dysfunction, Development and Life Extension in *Caenorhabditis elegans*

Shane L. Rea, Natascia Ventura, Thomas E. Johnson

Correction for:

Rea SL, Ventura N, Johnson TE (2007) Relationship between mitochondrial electron transport chain dysfunction, development, and life extension in *Caenorhabditis elegans*. PLoS Biol 5(10): e259. doi:10.1371/journal.pbio.0050259

The author affiliations were incorrect. The correct affiliations should appear as below:

Shane L. Rea<sup>1</sup>, Natascia Ventura<sup>1,2</sup>, Thomas E. Johnson<sup>1</sup>

<sup>1</sup> Institute for Behavioral Genetics, University of Colorado at Boulder, Boulder, Colorado, United States of America,

<sup>2</sup> Laboratory of Signal Transduction, Department of Experimental Medicine and Biochemical Sciences, University of Rome "Tor Vergata", Rome, Italy

\* To whom correspondence should be addressed. E-mail: reas3@uthscsa.edu

 These authors contributed equally to this work.

✉ Current address: Sam and Ann Barshop Institute for Longevity and Aging Studies and the Department of Physiology, University of Texas Health Science Center at San Antonio, San Antonio, Texas, United States of America

Citation: Rea SL, Ventura N, Johnson TE (2008) Correction: Relationship Between Mitochondrial Electron Transport Chain Dysfunction, Development and Life Extension in *Caenorhabditis elegans*. PLoS Biol 6(5): e136. doi:10.1371/journal.pbio.0060136

Received: April 23, 2008; Accepted: April 23, 2008; Published: May 27, 2008

Copyright: © 2008 Rea et al. This is an open-access article distributed under the terms of the Creative Commons Attribution License, which permits unrestricted use, distribution, and reproduction in any medium, provided the original author and source are credited.
